# Supplementary material for: Investigating the core microbiome concept: Daphnia as a case study
Source: Research Square preprint supplement (doi:10.21203/rs.3.rs-6032285/v1), 2025-05-06
Supplement: Supplementary file 1 [file 3df416bb9975716a0e0b9295.docx]

| **Combined dataset, both gut and whole animal samples n= 654**  **Table 3**: List of core taxa detected in the subgroups of the dataset at different core quantification metrices. | | | | |
| --- | --- | --- | --- | --- |
| **Prevalence** | **Relative abundance** | | | |
| **>0** | **>0.0001** | **>0.001** | **>0.01** |
| 99% | No taxa detected | No taxa detected | No taxa detected | No taxa detected |
| 90% | *Limnohabitans planktonicus (1)* | *Limnohabitans planktonicus* | ***Limnohabitans planktonicus*** | No taxa detected |
| 80% | ***Limnohabitans planktonicus(1)***  *Variovorax sp (4)*  *Chitinophagaceae_ unclassified(6)*  *Ideonella paludis(8)*  *Escherichia/Shigella(13)*  *Staphylococcus(41)* | ***Limnohabitans planktonicus*** | ***Limnohabitans planktonicus*** | No taxa detected |
| 50% | ***Limnohabitans planktonicus (1)***  ***Formosimonas (2)***  *Acinetobacter(3)*  ***Variovorax sp (4)***  *Chitinophagaceae_unclassified (6)*  ***Ideonella paludis (8)***  *Pseudomonas (10)*  *Rhodobacteraceae_unclassified(11)*  ***Escherichia/Shigella (13)***  *Comamonadaceae_unclassified(19, 29, 69, 164, 293)*  *Shinella (23)*  *Polynucleobacter(24)*  *Flavobacterium(14,26)*  *Emticicia(28),*  *Streptococcus(32)*  *Microbacteriaceae_unclassified(34)*  *Staphylococcus(41)*  *Hydrogenophaga(50)*  *Bosea(78)*  *Brevundimonas (81)*  *Sphingomonas (126)*  *Bradyrhizobium (145)* | ***Limnohabitans planktonicus (1)***  ***Formosimonas (2)***  ***Variovorax sp*** *(4)*  *Chitinophagaceae_unclassified (6)*  ***Ideonella paludis (8)***  *Pseudomonas(10)*  *Rhodobacteraceae_unclassified(11)*  ***Escherichia/Shigella(13)***  *Comamonadaceae_unclassified (19)*  *Shinella (23)*  *Emticicia(28)*  *Streptococcus(32)*  *Staphylococcus(41)* | ***Limnohabitans planktonicus (1)***  ***Formosimonas(2)***  ***Variovorax sp*** *(4)*  *Chitinophagaceae_unclassified (6)*  *Rhodobacteraceae_unclassified(11)*  ***Escherichia/Shigella (13)*** | ***Limnohabitans planktonicus*** |
| **Gut samples; n=423** | | | | |
| 99% | No taxa detected | No taxa detected | No taxa detected | No taxa detected |
| 90% | *Limnohabitans planktonicus* | *Limnohabitans planktonicus* | No taxa detected | No taxa detected |
| 80% | ***Limnohabitans planktonicus***  *Variovorax sp (4)*  ***Ideonella paludism (8)***  *Escherichia/Shigella(13)*  *Microbacteriaceae_unclassified(34)*  *Staphylococcus(41)* | ***Limnohabitans planktonicus***  ***Ideonella paludis (8)*** | ***Limnohabitans planktonicus*** | No taxa detected |
| 50% | ***Limnohabitans planktonicus***  ***Formosimonas (2)***  ***Acinetobacter (3)***  ***Variovorax sp, (4)***  ***Microbacteriaceae_unclassified (5)***  ***Chitinophagaceae_unclassified(6)***  ***Ideonella paludis (8)***  ***Flavobacterium(9)***  ***Pseudomonas(10)***  *Rhodobacteriaceae_unclassified(11)*  *Deefgea(12)*  ***Escherichia/Shigella(13)***  *Flavobacterium(14)*  *Aeromonas(15)*  *Comamonadaceae_unclassified(19)*  *Rhodanobacter (22)*  *Shinella (23)*  *Polynucleobacter (24)*  *Flavobacterium(26)*  *Emticicia(28)*  *Comamonadaceae_unclassified(29)*  *Streptococcus(32)*  *Microbacteriaceae_unclassified(34)*  ***Staphylococcus(41)***  ***Lacihabitans(44)***  ***Micrococcales_unclassified (45)***  *Hydrogenophaga (50)*  *Comamonas (110)*  *Sphaerotilus (118)*  *Cutibacterium (266)*  *Comamonadaceae_unclassified(293)* | ***Limnohabitans planktonicus***  ***Formosimonas (2)***  ***Acinetobacter (3)***  ***Variovorax sp, (4)***  ***Microbacteriaceae_unclassified (5)***  ***Chitinophagaceae_unclassified(6)***  ***Ideonella paludis (8)***  ***Flavobacterium(9)***  ***Pseudomonas (10)***  *Rhodobacteriaceae_unclassified (11)*  *Deefgea(12)*  ***Escherichia/Shigella(13)***  *Aeromonas(15)*  *Comamonadaceae_unclassified (19)*  *Polynucleobacter (24)*  *Streptococcus (32)*  *Microbacteriaceae_unclassified(34)*  ***Staphylococcus (41)*** | ***Limnohabitans planktonicus***  ***Variovorax sp. (4)***  ***Ideonella paludis (8)***  ***Escherichia/Shigella (13)***  *Microbacteriaceae_unclassified(34)*  ***Staphylococcus(41)*** | ***Limnohabitans planktonicus*** |
| **Gut samples: laboratory origin; n= 361** | | | | |
| 99% | ***Limnohabitans planktonicus*** | ***Limnohabitans planktonicus*** | No taxa detected | No taxa detected |
| 90% | ***Limnohabitans planktonicus (1)***  *Ideonella paludis(8)*  ***Escherichia/Shigella(13)*** | ***Limnohabitans planktonicus (1)***  ***Escherichia/Shigella(13)*** | ***Limnohabitans planktonicus*** | No taxa detected |
| 80% | ***Limnohabitans planktonicus (1)***  ***Variovorax sp(4)***  *Chitinophagaceae_unclassified(6)*  ***Ideonella paludis(8)***  *Pseudomonas (10)*  ***Escherichia/Shigella(13)***  *Polynucleobacter (24)*  *Streptococcus (32)*  *Microbacteriaceae_unclassified (34)*  ***Staphylococcus (41)*** | ***Limnohabitans planktonicus(1)***  ***Ideonella paludis (8)***  ***Escherichia/Shigella(13)***  ***Staphylococcus (41****)* | ***Limnohabitans planktonicus*** | ***Limnohabitans planktonicus*** |
| 50% | ***Limnohabitans planktonicus***  ***Formosimonas (2)***  ***Acinetobacter (3)***  ***Variovorax sp. (4)***  *Microbacteriaceae_unclassified (5)*  ***Chitiniphagaceae_unclassified(6)***  ***Ideonella paludis (8)***  ***Flavobacterium(9)***  ***Pseudomonas(10)***  ***Rhodobacteriaceae_unclassified (11)***  ***Deefgea(12)***  ***Escherichia/Shigella(13)***  ***Aeromonas(15)***  *Enterobacteriaceae_unclassified(16)*  ***Comamonadaceae_unclassified(19)***  *Rhodanobacter (22)*  *Shinella (23)*  ***Polynucleobacter (24)***  *Flavobacterium(26)*  *Emticicia(28)*  *Comamonadaceae_unclassified(29)*  ***Streptococcus(32)***  ***Microbacteriaceae_unclassified(34)***  ***Staphylococcus(41)***  *Lacihabitans(44)*  *Micrococcales_unclassified(45)*  *Hydrogenophaga(50)*  *Comamonadaceae_unclassified (84)*  *Streptococcus (86)*  *Sphaerotilus (118)*  *Comamonadaceae_unclassified(164)*  *Haemophilus (205)*  *Cutibacterium(266)*  *Comamonadaceae_unclassified(293)* | ***Limnohabitans planktonicus***  ***Formosimonas (2)***  ***Acinetobacter (3)***  ***Variovorax sp. (4)***  ***Microbacteriaceae_unclassified (5)***  ***Chitinophagaceae_unclassified (6)***  ***Ideonella paludis (8)***  ***Flavobacterium (9)***  ***Pseudomonas (10)***  ***Rhodobacteraceae_unclassified (11)***  ***Deefgea (12)***  ***Escherichia/Shigella (13)***  ***Aeromonas (15)***  ***Comamonadaceae_unclassified(19)***  *Rhodanobacter (22)*  *Shinella (23)*  ***Polynucleobacter (24)***  *Flavobacterium(26)*  *Emticicia(28)*  *Comamonadaceae_unclassified(29)*  ***Streptococcus(32)***  ***Microbacteriaceae_unclassified(34)***  ***Staphylococcus(41)***  *Micrococcales_unclassified(45)*  *Comamonadaceae_unclassified(293)* | ***Limnohabitans planktonicus***  ***Formosimonas (2)***  ***Variovorax sp. (4)***  ***Chitinophagaceae_unclassified (6)***  ***Ideonella paludis (8)***  ***Pseudomonas (10)***  ***Escherichia/Shigella (13)***  ***Polynucleobacter (24)***  ***Microbacteriaceae_unclassified(34)***  ***Staphylococcus(41)*** | ***Limnohabitans planktonicus*** |
| **Gut samples: field origin; n=62** | | | | |
| 99% | ***Pirellulales_unclassified (7)***  ***Rhodobacteraceae_unclassified (11)***  ***Solirubrobacterales_unclassified (21)***  *Methylocystis(39)*  *Roseimaritima (40)*  ***Pirellulales_unclassified (43)***  *Rhodobacteraceae_unclassified (71)*  *Mycobacterium (74)*  *Rhodobacteraceae_unclassified (75)*  ***Pirellulales_unclassified (87)***  *Hyphomicrobiaceae_unclassified (97)*  *Rhizobiales_unclassified (98)*  ***Pirellulaceae_unclassified (127)***  *Ilumatobacter (134)*  *Actinobacteria_unclassified (147)*  *Acidimicrobiales_unclassified (182)*  *Rhodobacteraceae_unclassified (186)*  *Actinobacteria_unclassified (197)*  *Isosphaeraceae_unclassified (217)*  ***Pirellulales_unclassified (225)***  *Nocardioides (289)*  ***Pirellulales_unclassified (324)***  ***Pirellulales_unclassified (336)***  *Aquihabitans (423)*  *Bacteria_unclassified (537)*  ***Pirellulales_unclassified (577)***  ***Pirellulales_unclassified (588)*** | ***Pirellulales_unclassified (7)***  ***Rhodobacteraceae_unclassified (11)***  ***Solirubrobacterales_unclassified (21)***  ***Pirellulales_unclassified(43)***  *Rhodobacteraceae_unclassified (71)*  *Mycobacterium (74)*  *Rhodobacteriaceae_unclassified (75)*  ***Pirellulales_unclassified (87)***  *Rhizobiales_unclassified (98)*  ***Pirellulaceae_unclassified (127)***  *Ilumatobacter (134)*  *Actinobacter_unclassified (147)*  *Acidimicrobiales_unclassiified (182)*  *Actinobacter_unclassified (197)*  ***Pirellulales_unclassified (336)*** | ***Pirellulales_unclassified (7)***  ***Rhodobacteraceae_unclassified (11)***  ***Solirubrobacterales_unclassified (21)***  ***Pirellulales_unclassified(43)*** | ***Pirellulales_unclassified (7)*** |
| 90% | 86 taxa  [Link to table](file:///C:\Users\u0142963\Documents\1_PROJECTS\CORE\Manuscript\Lists\90_percent_gut_field_samples_no_singletons.html) | ***Variovorax sp. (4)***  ***Pirellulales_unclassified (7)***  ***Rhodobacteraceae_unclassified (11)***  ***Verrucomicrobia_unclassified(17)***  ***Solirubrobacterales_unclassified (21)***  *Methylocystis(39)*  *Roseimaritima (40)*  ***Pirellulales_unclassified (43)***  ***Arenimonas(51)***  ***Pirellulales_unclassified (60)***  ***Isosphaeraceae_unclassified(67)***  *Rhodobacteraceae_unclassified (71)*  *Mycobacterium (74)*  *Rhodobacteraceae_unclassified (75)*  ***Pirellulales_unclassified (87)***  *Hyphomicrobiaceae_unclassified (97)*  *Rhizobiales_unclassified (98)*  ***Pirellulales_unclassified (122)***  ***Pirellulaceae_unclassified (127)***  *Ilumatobacter (134)*  *Actinobacteria_unclassified (147)*  *Acidimicrobiales_unclassified (182)*  *Rhodobacteraceae_unclassified (186)*  *Actinobacteria_unclassified (197)*  *Isosphaeraceae_unclassified (217)*  ***Pirellulales_unclassified (225)***  *Nocardioides (288)*  ***Pirellulales_unclassified (324)***  ***Pirellulales_unclassified (336)***  ***Pirellulales_unclassified (377)***  *Aquihabitans (423)*  ***Pirellulales_unclassified (566)*** | ***Pirellulales_unclassified (7)***  ***Rhodobacteraceae_unclassified (11)***  ***Solirubrobacterales_unclassified (21)***  ***Pirellulales_unclassified(43)***  *Rhodobacteraceae_unclassified (71)* | ***Pirellulales_unclassified (7)***  ***Solirubrobacterales_unclassified (21)*** |
| 80% | 153 taxa  [Link to table](file:///C:\Users\u0142963\Documents\1_PROJECTS\CORE\Manuscript\Lists\80_percent_field_samples.html) | 50 taxa  [Link to table](file:///C:\Users\u0142963\Documents\1_PROJECTS\CORE\Manuscript\Lists\80_percent_0.0001_field_samples.html) | *Variovorax sp. (4)*  *Pirellulales_unclassified (7)*  *Rhodobacteraceae_unclassified (11)*  *Verrucomicrobia_unclassified (17)*  *Solirubrobacterales_unclassified (21)*  *Pirellulales_unclassified (43)*  *Isosphaeraceae_unclassified (67)*  *Rhodobacteraceae_unclassified (71)*  *Pirellulales_unclassified (87)*  *Hyphomicrobiaceae_unclassified (97)*  *Rhizobiales_unclassified (98)*  *Acidimicrobiales_unclassified (182)*  *Actinobacteria_unclassified (197)* | *Pirellulales_unclassified (7)*  *Rhodobacteraceae_unclassified (11)*  *Solirubrobacterales_unclassified (21)* |
| 50% | 527 taxa  [Link to table](file:///C:\Users\u0142963\Documents\1_PROJECTS\CORE\Manuscript\Lists\50_percent_gut_field_samples.html) | 143 taxa  [Link to table](file:///C:\Users\u0142963\Documents\1_PROJECTS\CORE\Manuscript\Lists\50_percent_0.0001_field_samples_no_singletons.html) | *Variovorax sp (4)*  ***Pirellulales_unclassified (7)***  *Rhodobacteraceae_unclassified (11)*  *Verrucomicrobia_unclassified (17)*  *Solirubrobacterales_unclassified (21)*  *Methylocystis (39)*  *Roseimaritima (40)*  ***Pirellulales_unclassified (43)***  *Arenimonas (51)*  *Pirellulaceae_unclassified (60)*  *Porphyrobacter (65)*  *Isosphaeraceae_unclassified*  *(67)*  *Rhodobacteraceae_unclassified (71)*  *Mycobacterium (74)*  *Rhodobacteraceae_unclassified (75)*  ***Pirellulales_unclassified (87)***  *Hyphomicrobiaceae_unclassified (97)*  *Rhizobiales_unclassified (98)*  ***Pirellulaceae_unclassified (127)***  *Ilumatobacter (134)*  *Actinobacteria_unclassified (147)*  *Betaproteobacteria_unclassified (176)*  *Acidimicrobiales_unclassified (182)*  *Rhodobacteraceae_unclassified (186)*  *Actinobacteria_unclassified (197)*  ***Pirellulales_unclassified (199)***  *Isosphaeraceae_unclassified (217)*  ***Pirellulales_unclassified (225)***  *Leucobacter (263)*  *Alphaproteobacteria_unclassified (296)* | *Variovorax sp (4)*  *Pirellulales_unclassified (7)*  *Rhodobacteraceae_unclassified (11)*  *Solirubrobacterales_unclassified (21)*  *Roseimaritima (40)*  ***Pirellulales_unclassified (43)***  *Isosphaeraceae_unclassified*  *(67)*  *Rhodobacteraceae_unclassified (71)* |
| **Whole animal samples; n = 231** | | | | |
| 99% | No taxa detected | No taxa detected | No taxa detected | No taxa detected |
| 90% | ***Limnohabitans planktonicus (1)***  ***Formosimonas (2)***  ***Chitinophagaceae_unclassified (6)***  ***Flavobacterium (20)***  ***Emticicia (28)*** | ***Limnohabitans planktonicus (1)***  ***Formosimonas(2)***  ***Chitinophagaceae_unclassified (6)*** | ***Limnohabitans planktonicus*** | No taxa detected |
| 80% | ***Limnohabitans planktonicus (1)***  ***Formosimonas (2)***  *Variovorax sp. (4)*  ***Chitinophagaceae_unclassified (6)***  ***Rhodobacteraceae_unclassified (11)***  *Escherichia/Shigella (13)*  ***Comamonadaceae_unclassified (19)***  ***Flavobacterium (20)***  ***Shinella (23)***  ***Emticicia (28)***  *Bosea(78)*  ***Brevundimonas (81)***  ***Sphingorhabdus(111)*** | ***Limnohabitans planktonicus (1)***  ***Formosimonas (2)***  ***Chitinophagaceae_unclassified (6)***  ***Rhodobacteraceae_unclassified (11)***  ***Flavobacterium (20)***  ***Emticicia (28)*** | ***Limnohabitans planktonicus*** | ***Limnohabitans planktonicus*** |
| 50% | 57 taxa  [Link to table](C:\\Users\\u0142963\\Documents\\1_PROJECTS\\CORE\\Manuscript\\Lists\\Whole_Animal_50_percent_prevalence_57_taxa.html) | *Limnohabitans planktonicus (1)*  *Formosimonas* (2)  ***Variovorax sp. (4)***  ***Chitiniphagaceae_unclassified(6)***  ***Ideonella paludis (8)***  *Psuedomonas (10)*  *Rhodobacteraceae_unclassified (11)*  *Escherichia/Shigella (13)*  *Comamonadaceae_unclassified (19)*  *Flavobacterium (20)*  *Shinella (23)*  *Emticicia( 28)*  *Chryseobacterium (30)*  *Daejeonella(36)*  *Methylorubrum (37)*  *Staphylococcus (41) Limnobacter(46)*  *Pseudomonas (48)*  *Hydrogenophaga(50)*  *Sphingopyxis(52)*  *Fluviicola (53)*  *Brevundimonas(54) Blastomonas(63)*  *Comamonadaceae_unclassified(69)*  *Bosea (78)*  *Brevundimonas(81)*  *Rhizobiales_unclassified(85)*  *Fluviicola(96)*  *Nevskia(109)*  *Sphingomonas (126) Bradyrhizobium (145)*  *Sphingopyxis (150) Deinococcus (152) Corynebacterium (194)*  *Rhodopseudomonas (234)*  *Spirosoma(239)*  *Corynebacterium (244) Bacteroidetes_unclassified (248)*  *Lawsonella(378)* | ***Limnohabitans planktonicus***  ***Formosimonas (2)***  ***Variovorax sp. (4)***  ***Chitinophagaceae_unclassified (6)***  ***Rhodobacteraceae_unclassified (11)***  ***Flavobacterium (20)***  ***Shinella (23)***  ***Emticicia (28)***  *Limnobacter (46)*  *Hydrogenophaga (50)*  *Sphingopyxis (52)*  ***Brevundimonas (54)***  *Blastomonas (63)*  *Comamonadaceae_unclassified (69)*  *Bosea (78)*  ***Brevundimonas (81)***  *Rhizobiales_unclassified (85)* | ***Limnohabitans planktonicus***  ***Formosimonas (2)***  ***Chitinophagaceae_unclassified (6)***  ***Flavobacterium (20)*** |
